# Supplementary material
Source: Springer Nature journal article supplement (https://www.springermedizin.de/resource/supplementary/12958_2003_59_MOESM5_ESM.pdf/9566282)

**Control**

**E2**

**Cleaved caspase-3**

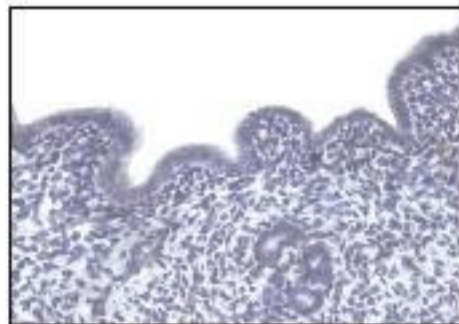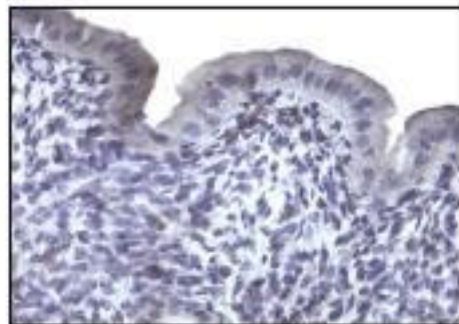

**Smac/DIABLO**

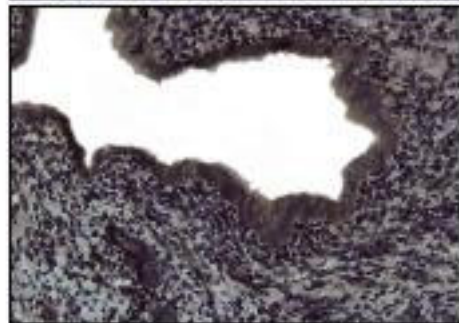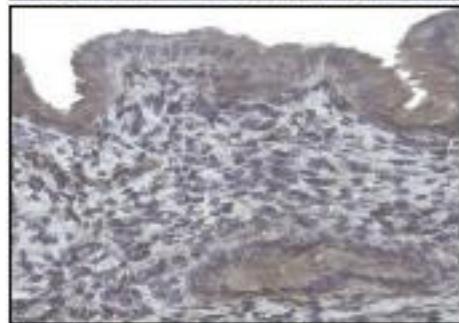

**XIAP**

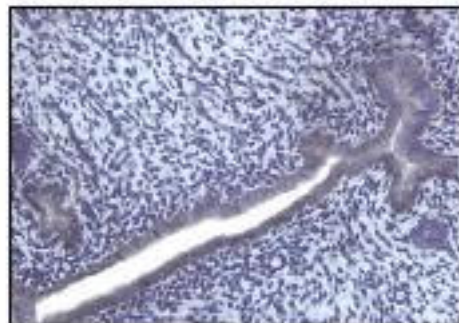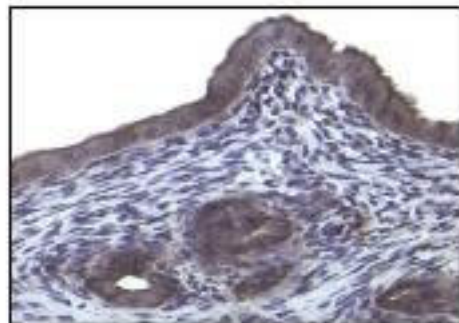

Supplement: MOESM5 [file 9566282]
